# Supplementary material for: Headspace Volatile Evaluation of Carrot Samples—Comparison of GC/MS and AuNPs-hpDNA-Based E-Nose
Source: PubMed Central journal article supplement (PMC6722575; doi:10.3390/foods8080293), 2019-07-27
Supplement: foods-08-00293-s001.pdf [file foods-08-00293-s001.pdf]

Supplementary Materials:

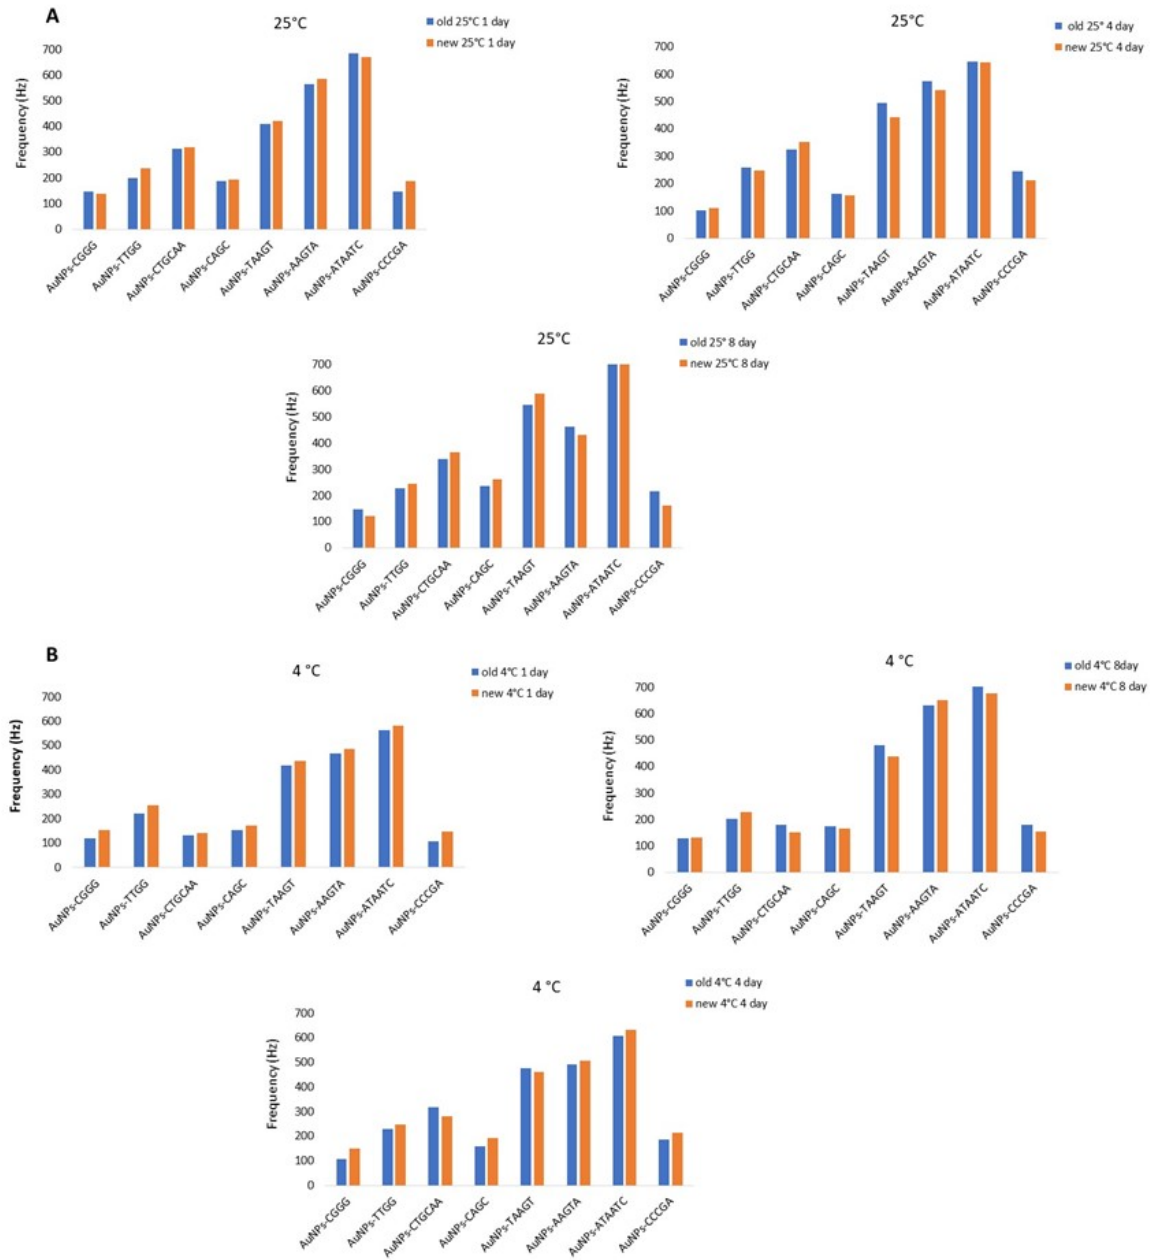

**Figure S1.** hpDNA-modified sensors array response vs. Octanal after three months from start analysis. (A) Represented the measurements carried out at 25 °C from 1th day to 8th day; (B) measurements carried out at 4 °C from 1st day to 8th day.

**Table S1.** Sequences of different loop size hpDNA.

| <i>hpDNA</i> | <i>Sequences</i> |
|--------------|------------------|
| Loop 4       | GAAG-TTGG-CTTC   |
| Loop 4       | GAAG-CGGG-CTTC   |
| Loop 4       | GAAG-CCAG-CTTC   |
| Loop 5       | GAAG-TAAGT-CTTC  |
| Loop 5       | GAAG-AAGTA-CCTT  |
| Loop 5       | GAAG-CCCGA-CTTC  |
| Loop 6       | GAAG-ATAATC-CTTC |
| Loop 6       | GAAG-CTGCAA-CTTC |
